# Supplementary material
Source: HighWire-hosted journal article supplement (https://bjgpopen.org/highwire/filestream/3333/field_highwire_adjunct_files/0/bjgpopen20X101109_Supp.pdf)
Supplement: bjgpopen20X101109_Supp.pdf [file bjgpopen20X101109_Supp.pdf]

**Table S1. Anatomic Therapeutic Code (ATC) codes**

| <b>Medication groups</b> |                                 | <b>ATC code</b> |
|--------------------------|---------------------------------|-----------------|
| Glucose lowering         |                                 | A10             |
| Anti trombotic           | Coumarine                       | B01AA           |
|                          | Platelet aggregation inhibition | B01AC           |
|                          | DOAC                            | B01AF           |
| Blood pressure lowering  | General                         | C02             |
|                          | Diuretics                       | C03             |
|                          | Peripheral vasodilation         | C04             |
|                          | B-blockers                      | C07             |
|                          | Ca-antagonists                  | C08             |
|                          | RAS-inhibitors                  | C09             |
| Lipid lowering           |                                 | C10             |

**Table S2 Data extracted with sources per database**

|                                | JGPN                     | UCC                                                         |
|--------------------------------|--------------------------|-------------------------------------------------------------|
| <b>Intoxications</b>           |                          |                                                             |
| Smoking                        | Coded field              | Questionnaire                                               |
| Alcohol use                    | Coded field              | Questionnaire                                               |
| <b>Physical activity</b>       | Coded field              | Questionnaire (SQUASH)                                      |
| <b>Biometric measurements</b>  |                          |                                                             |
| Weight                         | Coded field              | Questionnaire (self-measurement or measured at first visit) |
| Height                         | Coded field              | Questionnaire (self-measurement or measured at first visit) |
| BMI                            | Coded field              | Questionnaire (self-measurement or measured at first visit) |
| SBP                            | Coded field              | Coded field                                                 |
| DBP                            | Coded field              | Coded field                                                 |
| <b>Medical history</b>         |                          |                                                             |
| Cardiovascular diseases        | Coded field (ICPC)       | Questionnaire                                               |
| Cardiovascular risk factors    | Coded field (ICPC)       | Questionnaire, use of risk factor lowering medication       |
| <b>Medication use</b>          | Coded field (ATC codes)  | Questionnaire                                               |
| <b>Laboratory measurements</b> |                          |                                                             |
| TC, HDL, LDL, TG               | Coded field (laboratory) | Coded field (laboratory)                                    |
| eGFR, creatinine               | Coded field (laboratory) | Coded field (laboratory)                                    |
| HbA1c                          | Coded field (laboratory) | Coded field (laboratory)                                    |
| Hb                             | Coded field (laboratory) | Coded field (laboratory)                                    |

JGPN – Julius General Practitioners Network, UCC – Utrecht Cardiovascular Cohort, SQUASH – Short Questionnaire to Assess Health-enhancing physical activity, ICPC - International Classification of diseases in Primary Care, BMI – Body Mass Index, SBP – Systolic Blood Pressure, DBP – Diastolic Blood Pressure, TC - total cholesterol, LDL-c - low-density lipoprotein cholesterol, HDL-c - high-density lipoprotein cholesterol, TG - triglycerides, HbA1c - glycated haemoglobin , eGFR – estimated glomerular filtration rate, Hb - haemoglobin
